# Supplementary material for: Pyroptosis-Mediated Damage Mechanism by Deoxynivalenol in Porcine Small Intestinal Epithelial Cells
Source: MDPI journal article supplement (doi:10.3390/toxins15040300), 2023-04-19
Supplement: s1 [file s1]

# Supplementary Materials: Pyroptosis-Mediated Damage Mechanism by Deoxynivalenol in Porcine Small Intestinal Epithelial Cells

Tae Hong Kang, Sangsu Shin, JeongWoong Park, Bo Ram Lee and Sang In Lee

Table S1. List of primer.

| Gene symbol  | Description                                               | Accession No. |         | Sequence (5'-3')            | Sequence size | annealing temperature |
|--------------|-----------------------------------------------------------|---------------|---------|-----------------------------|---------------|-----------------------|
| SOD1         | Superoxide dismutase 1                                    | NM_001190422  | Forward | GAG ACC TGG GCA ATG TGA C   | 228           | 56°C                  |
|              |                                                           |               | Reverse | GAG GGA ATG TTT ACT GGG TGA |               |                       |
| GCLM         | Glutamate-cysteine ligase modifier subunit                | XM_001926378  | Forward | CTT GCC TCT TGC TGT GTG AT  | 145           | 56°C                  |
|              |                                                           |               | Reverse | CGA TGT CAG GGA TGC TTT C   |               |                       |
| GCLC         | Glutamate-cystein ligase catalytic subunit                | XM_021098556  | Forward | CGT CTT TAC TGG GGG AAA AC  | 148           | 56°C                  |
|              |                                                           |               | Reverse | TTT ATC GCT TCG TCT GGA AA  |               |                       |
| CAT          | Catalase                                                  | NM_214301     | Forward | GGC TTT TGG CTA CTT TGA GG  | 148           | 56°C                  |
|              |                                                           |               | Reverse | AGG GTC ACG AAC TGT GTC AG  |               |                       |
| IL-18        | Interleukin18                                             | NM_213997     | Forward | GCA TCA GCT TTG TGG AAA TG  | 179           | 56°C                  |
|              |                                                           |               | Reverse | GAA AAG GAC TTG GTC GTT CAG |               |                       |
| IL-1 $\beta$ | IL-1beta                                                  | NM_001305893  | Forward | GAA CAA GAG CAT CAG GCA GA  | 176           | 58.2°C                |
|              |                                                           |               | Reverse | TGG CAT CAC AGA CAA AGT CA  |               |                       |
| NLRP3        | NLR pyrin domain containing 3                             | NM_001256770  | Forward | TCC TGA GCA ACA ACC AGA AG  | 143           | 56°C                  |
|              |                                                           |               | Reverse | TGT GAG ACA GCA ACT GAC CA  |               |                       |
| TXNIP        | Thioredoxin interacting protein                           | NM_001044614  | Forward | TTG GAG GAA AGA CAG GAA AGA | 223           | 56°C                  |
|              |                                                           |               | Reverse | AAC AAA ACC CCG AAT CAA AG  |               |                       |
| GSDMD        | Gasdermin D                                               | XM_021090506  | Forward | CAG AAG GAG GTG GAG GTC AC  | 186           | 58.7°C                |
|              |                                                           |               | Reverse | GTC CCA GTC AGA ACC AAT CAC |               |                       |
| ASC          | apoptosis-associated speck-like protein containing a card | XM_003124468  | Forward | AGC AGA CAA CAA ACC AGC AC  | 175           | 57.5°C                |
|              |                                                           |               | Reverse | GAA GAG CCT CCT CAT TTT GG  |               |                       |
| CASP1        | Caspase 1                                                 | NM_214162     | Forward | CTG GCA TTT GTG GGA AGA A   | 174           | 56°C                  |
|              |                                                           |               | Reverse | ATC CAT ACG ACC CCT TGC T   |               |                       |
| GAPDH        | Glyceraldehyde-3-phosphate dehydrogenase                  | NM_001206359  | Forward | ACA CCG AGC ATC TCC TGA CT  | 150           | 56°C                  |
|              |                                                           |               | Reverse | GAC GAG GCA GGT CTC CCT AA  |               |                       |
